# Supplementary material for: Brain Tissue Oxygenation-Guided Therapy and Outcome in Traumatic Brain Injury: A Single-Center Matched Cohort Study
Source: MDPI journal article supplement (doi:10.3390/brainsci12070887), 2022-07-06

**Electronic Supplemental Material - Brain Tissue Oxygenation-Guided Therapy  
and Outcome in Traumatic Brain Injury: a single-center matched cohort study**

**Table S1:** Logistic regression for the association of PbtO<sub>2</sub> monitoring and hospital mortality.

|                              | Univariable analysis<br>OR (95% CI) | Multivariable analysis<br>OR (95% CI) |
|------------------------------|-------------------------------------|---------------------------------------|
| Age                          | 1.05 (1.02-1.07)                    | 1.06 (1.03-1.10)                      |
| GCS on admission             | 0.93 (0.83-1.03)                    | 0.83 (0.72-0.96)                      |
| ICHT                         | 7.23 (2.65-19.71)                   | 9 (2.69-30.9)                         |
| PbtO <sub>2</sub> monitoring | 0.51 (0.22-1.18)                    | 1.33 (0.46-3.87)                      |

GCS: Glasgow coma scale; ICHT: intracranial hypertension; PbtO<sub>2</sub>: brain tissue oxygenation monitoring

**Table S2:** Logistic regression for the association of PbtO<sub>2</sub> monitoring and unfavorable neurological outcome (GOS 1-3) at 3 months.

|                              | Univariable analysis<br>OR (95% CI) | Multivariable analysis<br>OR (95% CI) |
|------------------------------|-------------------------------------|---------------------------------------|
| Age                          | 1.04 (1.01-1.06)                    | 1.06 (1.03-1.10)                      |
| GCS on admission             | 0.86 (0.77-0.96)                    | 0.74 (0.63-0.88)                      |
| ICHT                         | 4.84 (1.99-11.72)                   | 4.93 (1.65-14.71)                     |
| PbtO <sub>2</sub> monitoring | 0.43 (0.19-1.01)                    | 0.71 (0.25-2.03)                      |

GCS: Glasgow coma scale; ICHT: intracranial hypertension; PbtO<sub>2</sub>: brain tissue oxygenation monitoring

**Table S3:** Characteristics of patients admitted from February 2017 to December 2019. Data are presented as mean ( $\pm$ SD), count (%) or median (25<sup>th</sup>-75<sup>th</sup> percentiles).

|                                      | ICP-group<br>(N=24) | ICP/PbtO <sub>2</sub> -group<br>(N=35) | p value |
|--------------------------------------|---------------------|----------------------------------------|---------|
| Age, years                           | 55 ( $\pm$ 21)      | 45 ( $\pm$ 17)                         | 0.02    |
| Male gender, n (%)                   | 14 (58)             | 24 (69)                                | 0.58    |
| Arterial hypertension, n (%)         | 10 (42)             | 7 (20)                                 | 0.09    |
| Diabetes mellitus, n (%)             | 2 (8)               | 2 (6)                                  | 0.99    |
| Heart disease, n (%)                 | 1 (4)               | 2 (6)                                  | 0.99    |
| Previous neurological disease, n (%) | 1 (4)               | 2 (6)                                  | 0.99    |
| Alcohol use, n (%)                   | 7 (29)              | 10 (29)                                | 0.99    |
| Smoking, n (%)                       | 6 (25)              | 5 (14)                                 | 0.33    |
| COPD, n (%)                          | 0                   | 0                                      | -       |
| Liver cirrhosis, n (%)               | 2 (8)               | 1 (3)                                  | 0.56    |
| Cancer, n (%)                        | 1 (4)               | 1 (3)                                  | 0.99    |
| Chronic kidney disease, n (%)        | 1 (4)               | 0                                      | 0.41    |
| APACHE score                         | 16 (16-21)          | 20 (17-23)                             | 0.18    |
| SOFA score                           | 9 (4-10)            | 8 (8-10)                               | 0.60    |
| GCS on admission                     | 5 (3-10)            | 5 (3-7)                                | 0.84    |
| Marshall score, n (%)                |                     |                                        |         |
| 1                                    | 0                   | 0                                      | 0.45    |
| 2                                    | 1 (4)               | 2 (6)                                  |         |
| 3                                    | 1 (4)               | 1 (3)                                  |         |
| 4                                    | 4 (17)              | 2 (6)                                  |         |
| 5                                    | 17 (71)             | 30 (86)                                |         |
| 6                                    | 1 (4)               | 0                                      |         |
| Reacting pupils, n (%)               | 13 (54)             | 26 (74)                                | 0.16    |
| Traumatic SAH, n (%)                 | 22 (92)             | 28 (80)                                | 0.29    |
| Epidural Hematoma, n (%)             | 15 (63)             | 30 (86)                                | 0.06    |
| Hypotension, n (%)                   | 6 (25)              | 16 (46)                                | 0.17    |
| Hypoxemia, n (%)                     | 13 (54)             | 21 (60)                                | 0.79    |
| Sodium, mmol/L                       | 140 (138-142)       | 137 (135-140)                          | 0.04    |
| Glucose, mg/dL                       | 134 (116-177)       | 131 (122-167)                          | 0.62    |
| Hemoglobin, g/dL                     | 12.2 (10.3-14.5)    | 12.2 (10.3-14.5)                       | 0.88    |
| Mechanical ventilation, n (%)        | 24 (100)            | 35 (100)                               | -       |
| Vasopressors, n (%)                  | 19 (79)             | 33 (94)                                | 0.11    |
| Inotropes, n (%)                     | 3 (13)              | 6 (17)                                 | 0.73    |
| RRT, n (%)                           | 0                   | 1 (3)                                  | 0.99    |
| EVD, n (%)                           | 24 (100)            | 27 (77)                                | 0.02    |
| Intracranial hypertension, n (%)     | 18 (75)             | 16 (46)                                | 0.03    |
| Brain tissue hypoxia, n (%)          | NA                  | 24 (69)                                | -       |
| Seizures, n (%)                      | 7 (29)              | 8 (23)                                 | 0.76    |
| TIL score basic                      |                     |                                        |         |
| 1                                    | 6 (25)              | 9 (26)                                 | 0.42    |
| 2                                    | 9 (38)              | 7 (20)                                 |         |
| 3                                    | 4 (17)              | 6 (17)                                 |         |
| 4                                    | 5 (21)              | 13 (37)                                |         |
| Osmotic therapy, n (%)               | 14 (58)             | 18 (51)                                | 0.79    |

|                                         |           |            |       |
|-----------------------------------------|-----------|------------|-------|
| <b>Hypothermia, n (%)</b>               | 7 (29)    | 8 (23)     | 0.76  |
| <b>Barbituric, n (%)</b>                | 3 (13)    | 4 (11)     | 0.99  |
| <b>Decompressive craniectomy, n (%)</b> | 5 (21)    | 11 (31)    | 0.55  |
| <b>ICU LOS, days</b>                    | 6 (2-14)  | 16 (9-25)  | 0.002 |
| <b>Hospital LOS, days</b>               | 12 (2-50) | 30 (14-66) | 0.03  |
| <b>GCS at ICU discharge</b>             | 3 (3-12)  | 10 (3-14)  | 0.36  |
| <b>ICU death, n (%)</b>                 | 13 (54)   | 13 (37)    | 0.29  |
| <b>Hospital death, n (%)</b>            | 13 (54)   | 13 (37)    | 0.29  |
| <b>GOS at 3 months</b>                  | 1 (1-3)   | 3 (1-4)    | 0.15  |

COPD = chronic obstructive pulmonary disease; APACHE: acute physiology and chronic health examination; SOFA: sequential organ failure assessment; GCS: Glasgow coma scale; GOS: Glasgow outcome scale; ICU: intensive care unit; LOS: length of stay; TIL: therapy intensity level; RRT: renal replacement therapy; EVD: external ventricular drainage; SAH : subarachnoid hemorrhage

**Supplemental Figure S1:** Panel A) Number of patients included in the study each year, according to the monitoring strategy (ICP or ICP/PbtO<sub>2</sub>); Panel B) Percentage of non-survivors each year, according to the monitoring strategy (ICP or ICP/PbtO<sub>2</sub>); Panel C) Percentage of patients with unfavorable neurological outcome at 3 months (Glasgow outcome scale 1-3) each year, according to the monitoring strategy (ICP or ICP/PbtO<sub>2</sub>).

A)

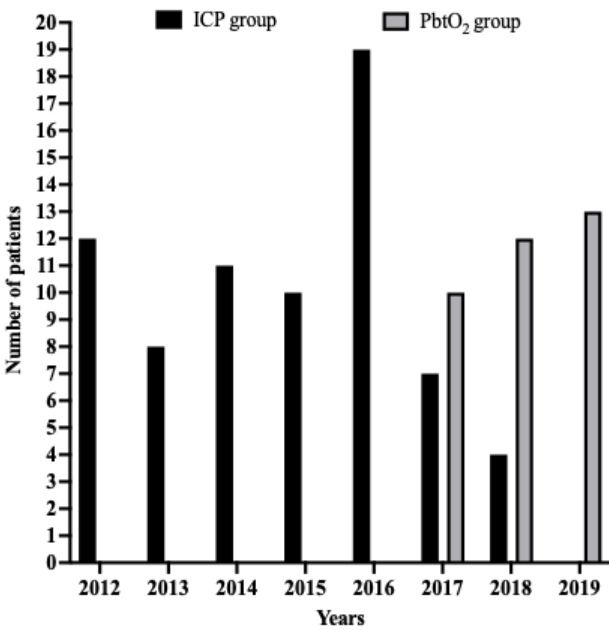

B)

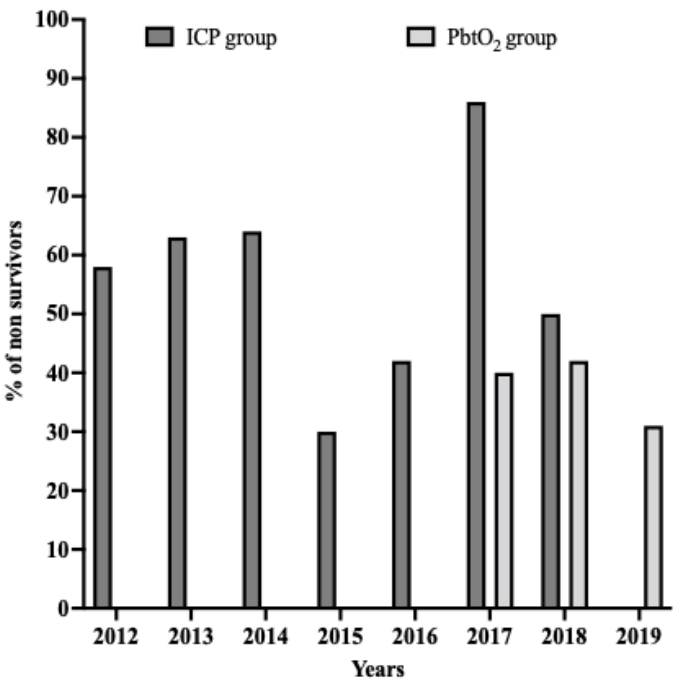

C)

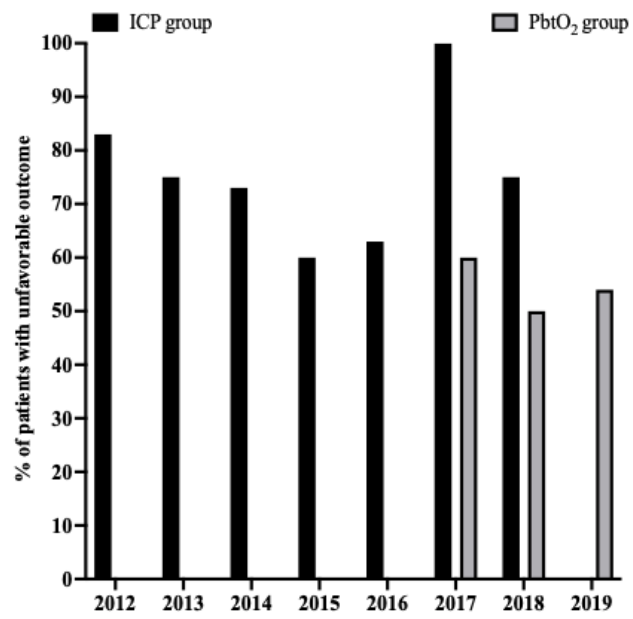

**Supplemental Figure S2:** Kaplan Meier curve of survival in ICP and ICP/PbtO<sub>2</sub> group.

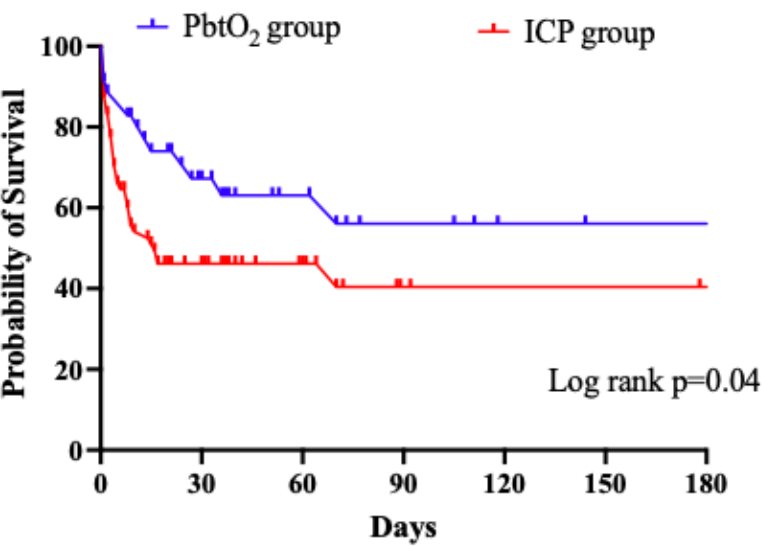

Supplement: s1 [file s1]
